# Supplementary material for: Facile synthesis of a two-dimensional layered Ni-MOF electrode material for high performance supercapacitors
Source: Royal Society of Chemistry journal article supplement (doi:10.1039/c8ra01002a), 2018-01-01
Supplement: c8ra01002a1.pdf [file c8ra01002a1.pdf]

## Supporting information for

# Facile Synthesis of Two-dimensional Layered Ni-MOF Electrode Material for High Performance Supercapacitors

Cunrong Zhang,<sup>a</sup> Qi Zhang,<sup>\*a</sup> Kai Zhang,<sup>a</sup> Zhenyu Xiao,<sup>a</sup> Yu Yang,<sup>a</sup> Lei Wang<sup>\*a</sup>

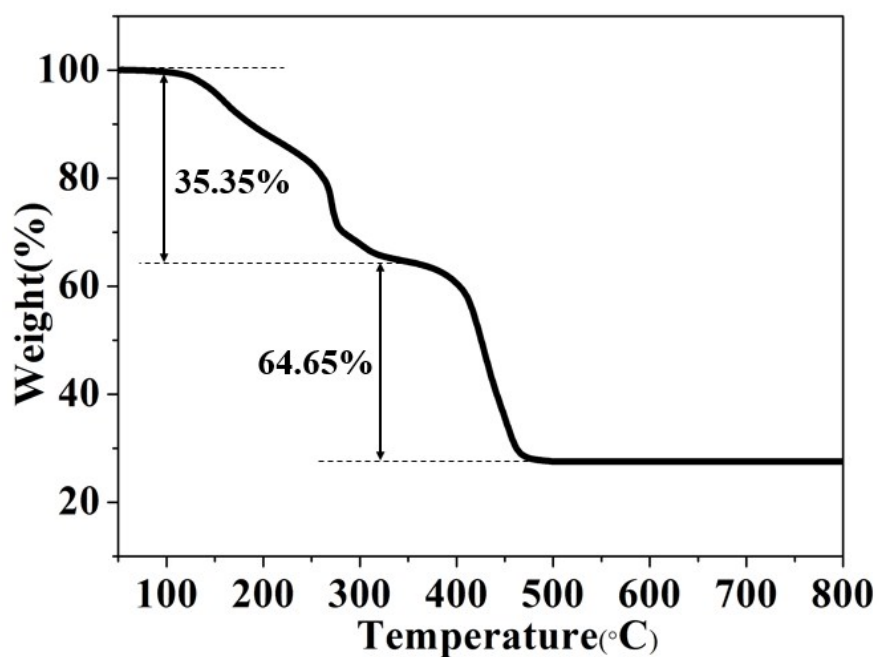

Fig S1 TG patterns of the as-synthesized Ni-MOF.

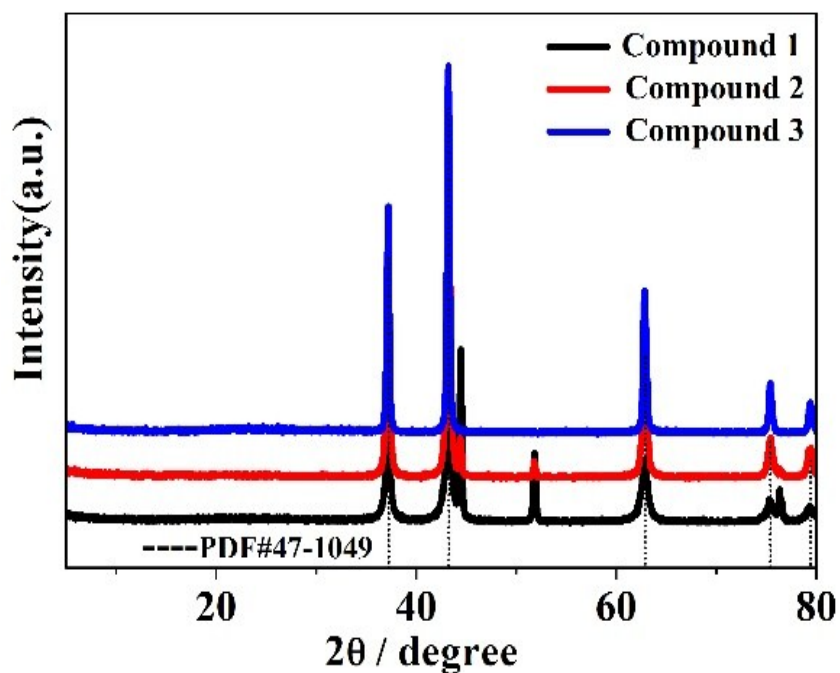

**Figure S2** PXRD patterns of different materials obtained from Ni-MOF.

**Table S1** The specific capacitance of different materials in three-electrode system at current density of 2 A g<sup>-1</sup>.

| Material   | Calcination temperature (°C) | Specific BET surface area (m <sup>2</sup> g <sup>-1</sup> ) | Specific Capacitance (F g <sup>-1</sup> ) |
|------------|------------------------------|-------------------------------------------------------------|-------------------------------------------|
| Ni-MOF     | —                            | 436.06                                                      | 1688.9                                    |
| Compound 1 | 400                          | 123                                                         | 198.7                                     |
| Compound 2 | 500                          | 98                                                          | 82.0                                      |
| Compound 3 | 600                          | 60                                                          | 77.7                                      |

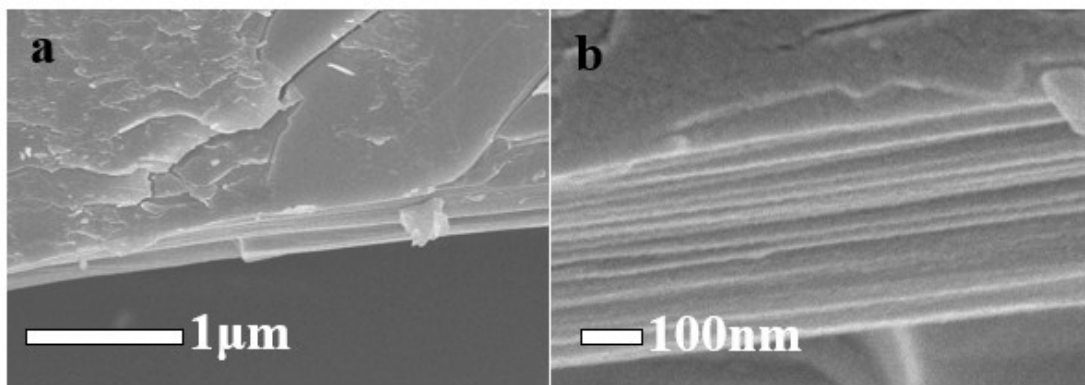

**Figure S3** (a and b) The SEM of the 2D Ni-MOF.

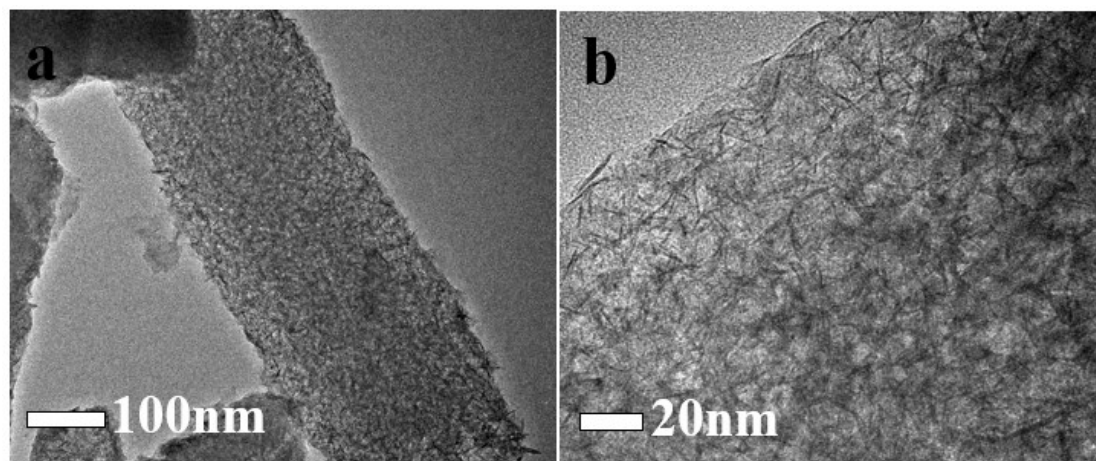

**Figure S4** (a and b) TEM images of the Ni-MOF after 5000 charge-discharge.

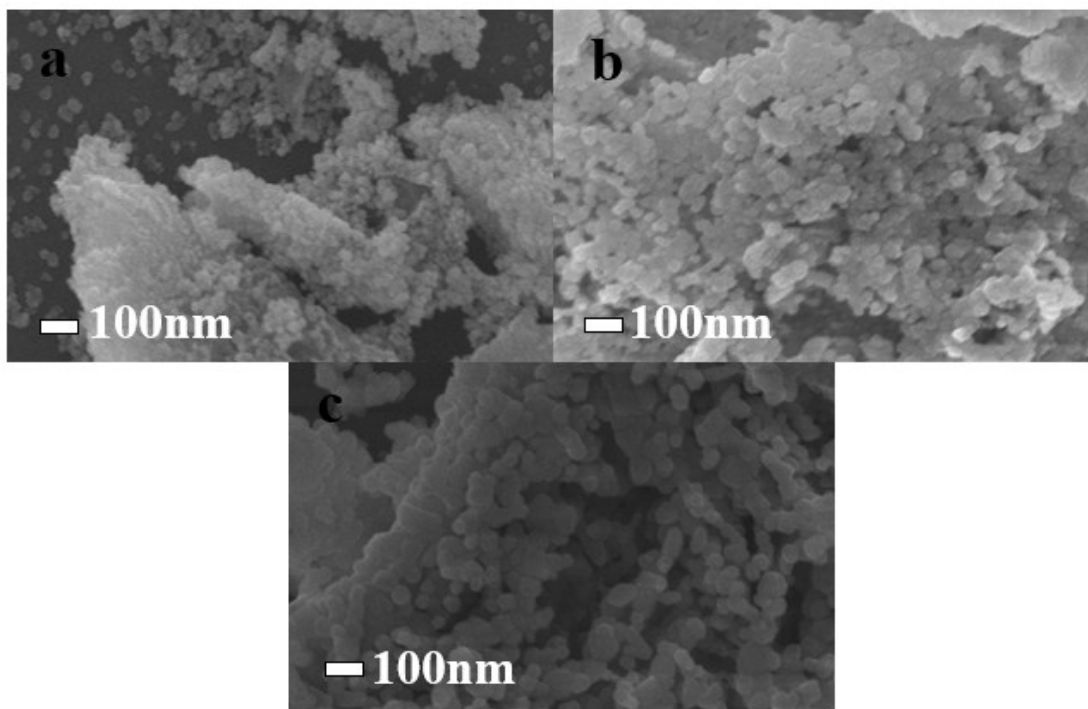

**Figure S5** SEM images of compound 1(a), compound 2(b) compound 3(c).

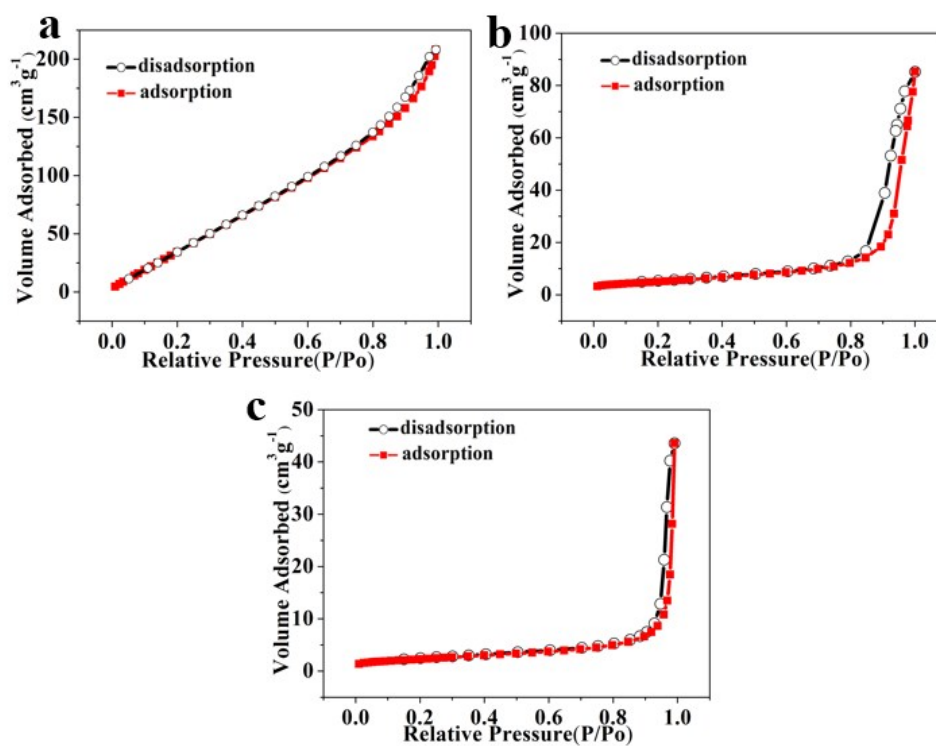

**Figure S6** Typical isothermal nitrogen adsorption–desorption isotherms compound 1(a), compound 2(b), compound 3(c) derived from Ni-MOF.
